# Supplementary material
Source: PubMed Central journal article supplement (PMC5038235)
Supplement: AAC.01008-16_zac009165481so1.pdf [file AAC.01008-16_zac009165481so1.pdf]

## Supplemental Information for Wei et al.

### Materials and Methods

#### *Preparation of E. coli Spheroplasts*

Spheroplasts were prepared from *E. coli* strain Top 10 (containing a pET45b plasmid for ampicillin resistance) in steps similar to that described in Martinac et al. (1). An overnight culture grown (37°C in shaking incubator, approximately 148 rpm) from one plate-picked colony was diluted 1:100 in TSB liquid media in the presence of ampicillin (25 µg/mL) and allowed to grow to OD<sub>600</sub> of 0.5-0.7. 3 mL of this culture was diluted 1:10 into ampicillin-containing TSB media and cephalixin was added to reach a final concentration of 60 µg/ml. The culture was then shaken at 37°C for 2-3 hours until single-cell filaments reached sufficient length observable under light microscope at 1000x oil immersion magnification; Martinac et al. noted that filaments from 50-150 µm should produce spheroplasts 5-10 µm in diameter (1).

Filaments were harvested by centrifugation at 1500 x g for 4 minutes, and the pellet was rinsed without resuspension by gentle addition of 1 mL of 0.8 M sucrose with 1 min incubation at room temperature and then re-suspended in 3 mL of 0.8M sucrose after supernatant has been removed via pipetting. The following reagents were added in order: 150 µL of 1 M Tris Cl (pH 7.8); 120 µL of lysozyme (5mg/ml); 30 µL of Dnase I (5mg/ml); and 120 µL of 0.125 M sodium EDTA (pH 8.0). This mixture was incubated at room temperature for 6 - 10 minutes to hydrolyze the peptidoglycan layer, and spheroplast formation was followed under microscope at 1000x. 1 mL of Solution A (20 mM MgCl<sub>2</sub>, 0.7 M sucrose, 10 mM Tris Cl at pH 7.8) was gradually added over a 1 minute period while stirring, and the mixture was incubated for 4 minutes at room

temperature. The mixture was layered over two separate 7-mL aliquots of Solution B (10 mM MgCl<sub>2</sub>, 0.8 M sucrose, 10 mM Tris Cl at pH 7.8) previously kept on ice. These mixtures were centrifuged for 2 minutes at 1000 x g to collect spheroplasts into a pellet, and the majority of the supernatant was removed via pipetting. Spheroplast pellets were re-suspended in about 300 µL of remaining liquid.

### *Confocal Microscopy Imaging of Spheroplasts*

Spheroplasts were either prepared immediately before or thawed from frozen stock at -80°C and diluted 1:2 in 0.8 M sucrose. Spheroplasts frozen for at least 1-2 weeks appeared to provide consistent results in these experiments. Diluted spheroplasts were then placed on a poly-L-lysine coated glass slide and incubated with equal volume of FITC-labeled peptide (peptide stock concentration of 1.1-6.2x10<sup>-4</sup>M), giving an effective peptide concentration above the MIC for BF2, P11A BF2 and magainin 2 (HipC has effectively no antibacterial activity against *E. coli*). Peptides were typically incubated with spheroplasts for 1 minute, although some samples with HipC were allowed to incubate for 10-20 minutes. All peptides were synthesized at >95% purity by NeoScientific (Cambridge, MA) with a FITC group conjugated at the N-terminus. 1 µL of di-8-ANEPPS (Biotium, Hayward, CA) membrane dye was also added to membrane labeled samples. Spheroplasts were visualized with a Leica TCS SP5 laser scanning confocal microscope with excitation at 488 nm by an argon laser at 20% laser power output and 20% transmission and emission ranges of 499-532 nm (FITC) and 670-745 nm (di-8-ANEPPS). 8-bit, 512x512 images were collected at 63X magnification (Leica Plan-Apochromat oil objective; numerical aperture 1.40). Composite images were produced by Leica LAS AF software (Buffalo Grove, IL). Z-stacks composed of slices with 0.04-0.08 µm thickness were evaluated for localization of peptide

fluorescence within the spheroplast to prevent bias in the reading of the data. Data for each peptide was collected from a minimum of at least two independently prepared batches of spheroplasts characterized over a total of at least five separate imaging sessions for each peptide (Supplemental Tables 1-4). Data was generally consistent between different batches, although a few outliers, particularly one batch incubated with buforin II, emphasizes the need for sufficient replication to robustly characterize peptide mechanisms.

## Supplemental Tables

Table 1: Percentages of imaged spheroplasts showing translocation and membrane localization of buforin II (BF2) for different spheroplast batches

|                          | Batch 1 | Batch 2 | Batch 3 | Batch 4 |
|--------------------------|---------|---------|---------|---------|
| % translocating          | 83      | 11      | 78      | 85      |
| % membrane localized     | 17      | 89      | 22      | 15      |
| n of spheroplasts imaged | 6       | 19      | 9       | 33      |

Table 2: Percentages of imaged spheroplasts showing translocation and membrane localization of P11A buforin II (BF2) for different spheroplast batches

|                          | Batch 1 | Batch 2 | Batch 3 | Batch 4 | Batch 5 |
|--------------------------|---------|---------|---------|---------|---------|
| % translocating          | 60      | 22      | 42      | 21      | 15      |
| % membrane localized     | 40      | 78      | 58      | 79      | 85      |
| n of spheroplasts imaged | 5       | 27      | 19      | 24      | 26      |

Table 3: Percentages of imaged spheroplasts showing translocation and membrane localization of magainin 2 for different spheroplast batches

|                          | Batch 1 | Batch 2 |
|--------------------------|---------|---------|
| % translocating          | 17      | 21      |
| % membrane localized     | 83      | 78      |
| n of spheroplasts imaged | 46      | 14      |

Table 4: Percentages of imaged spheroplasts showing translocation and membrane localization of HipC for different spheroplast batches

|                          | Batch 1 | Batch 2 | Batch 3 | Batch 4 |
|--------------------------|---------|---------|---------|---------|
| % translocating          | 71      | 100     | 100     | 100     |
| % membrane localized     | 28      | 0       | 0       | 0       |
| n of spheroplasts imaged | 7       | 2       | 22      | 36      |

## Supplemental Figures

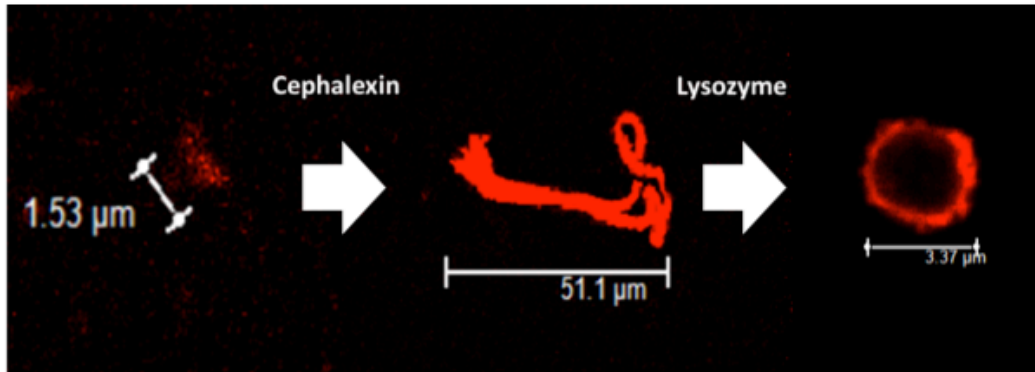

Supplemental Figure 1: Representative confocal microscopy images of *E. coli* at different stages during the formation of spheroplasts. Fluorescence shown is from the membrane dye di-8-ANEPPS.

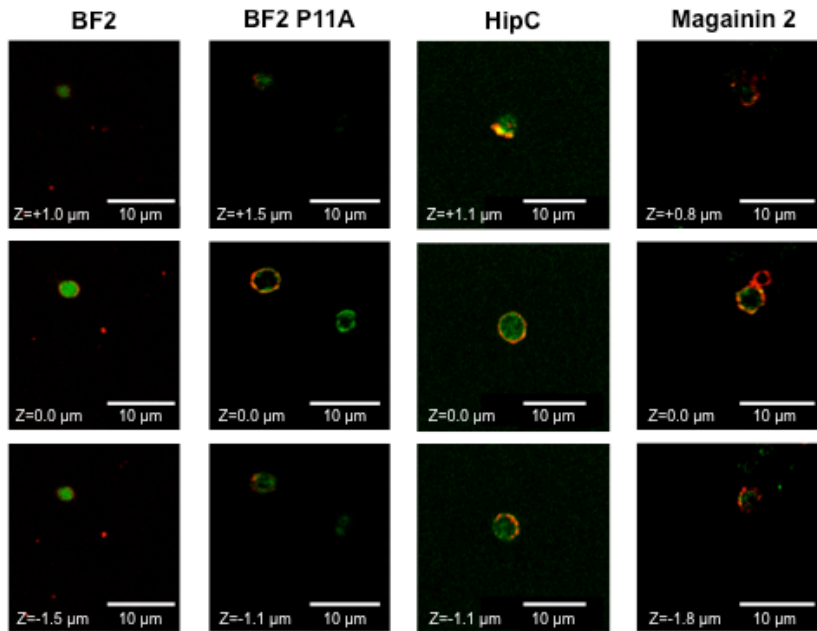

Supplemental Figure 2: Confocal images of representative *E. coli* spheroplasts incubated with FITC labeled peptides (BF2, P11A BF2, HipC or magainin 2) and di-8-ANEPPS. The merged fluorescence of FITC (green) and di-8-ANEPPS (red) is shown. Images from three different positions in a single z-stack are shown for each peptide; z-positions are given relative to the middle image of each stack.

## **Supplemental Information References**

1. **Martinac, B., M. Buechner, A.H. Delcour, J. Adler, and C. Kung, 1987 Pressure-sensitive ion channel in Escherichia coli. Proc Natl Acad Sci U S A 84:2297-301.**
